# Supplementary material for: A new insight into the conformation and melt dynamics of hydrogenated polybutadiene as revealed by computer simulations
Source: Royal Society of Chemistry journal article supplement (doi:10.1039/c5sm03080c), 2016-01-01
Supplement: c5sm03080c1.pdf [file c5sm03080c1.pdf]

## Supplementary Information

### **A new insight on the conformation and melt dynamics of hydrogenated polybutadiene as revealed by computer simulation**

Javier Ramos, Juan F. Vega and Javier Martínez-Salazar

### S.1 End-to-end autocorrelation function and Mean-square internal distances

The end-to-end autocorrelation function ( $\langle \mathbf{u}(t)\mathbf{u}(0) \rangle$ ) and the mean square internal distances for the linear polyethylene (LPE) and hydrogenated polybutadienes (PEB2) models are shown in Figure S.1. The  $\langle \mathbf{u}(t)\mathbf{u}(0) \rangle$  is fitted with the Kohlrausch-Williams-Watts (KWW) stretch exponential function (dashed lines in Figure S.1.a) as:

$$G(t) = A e^{-\left(t/\tau_{KWW}\right)^\beta}$$

The integration of the KWW curves allows one to get the end-to-end relaxation time ( $\tau_{ACF}$ ) as follows:

$$\tau_{ACF} = \int_0^\infty G(t) dt = A \frac{\tau_{KWW}}{\beta} \Gamma\left(\frac{1}{\beta}\right)$$

, where  $\Gamma()$  designates the gamma function. In general, the fitting using the KWW function is very good.

The parameters of the fitting are shown in Table S.1. The relaxation time ( $\tau_{ACF}$ ) increases both with length chain and with the presence of branches. At the same time, the parameter  $\beta$  decreases for branched systems as compared with the linear system of the same molecular length.

**Table S.1: Fitting parameters of the end-to-end autocorrelation function to the KWW stretch exponential function.**

| Model    | A    | $\beta$ | $\tau_{KWW}$ (ns) | $\tau_{ACF}$ (ns) |
|----------|------|---------|-------------------|-------------------|
| LPE36    | 1.00 | 0.920   | 0.129             | 0.135             |
| LPE106   | 0.98 | 0.710   | 1.387             | 1.698             |
| LPE192   | 0.98 | 0.632   | 5.248             | 7.256             |
| LPE377   | 0.99 | 0.538   | 27.502            | 47.991            |
| PBE2_36  | 1.00 | 0.907   | 0.131             | 0.137             |
| PBE2_106 | 0.98 | 0.696   | 1.390             | 1.734             |
| PBE2_192 | 0.98 | 0.615   | 5.392             | 7.705             |
| PBE2_377 | 0.99 | 0.524   | 31.929            | 58.193            |

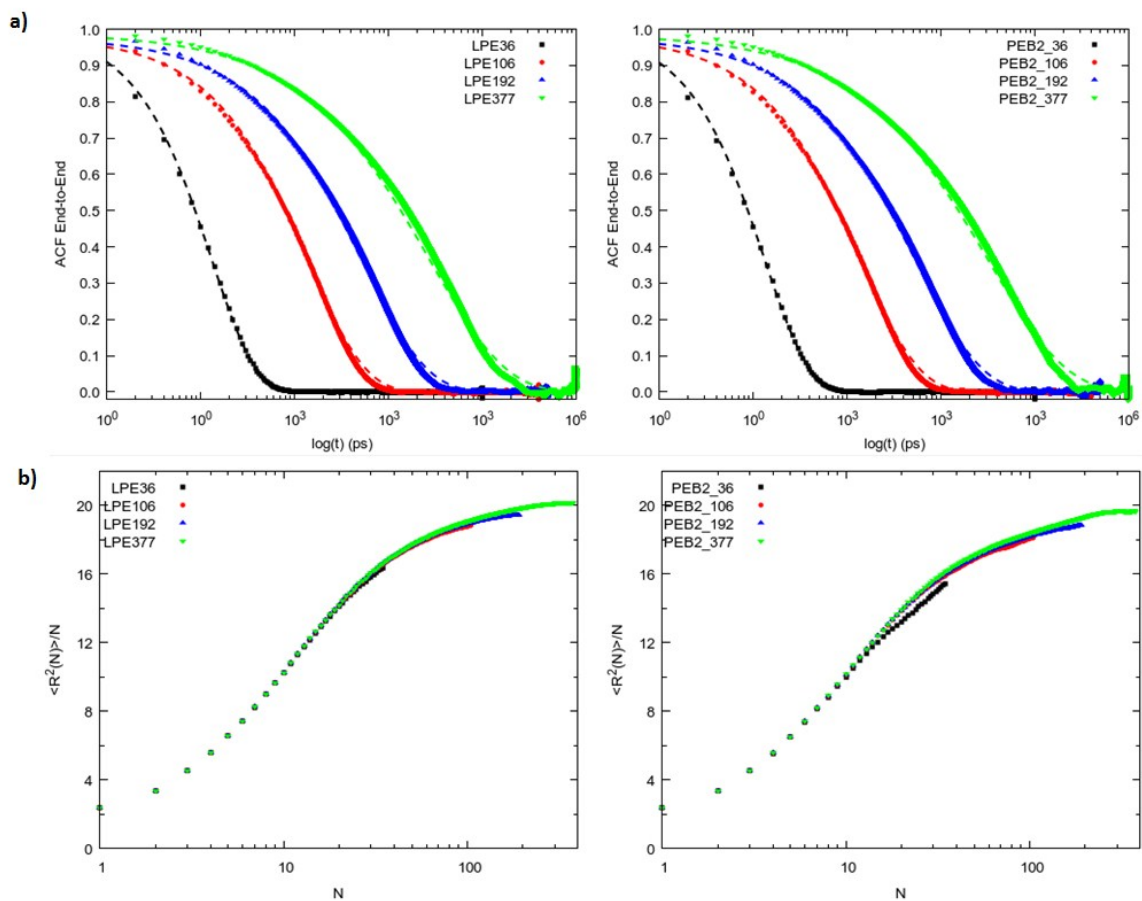

**Figure S.1.a)** End-to-end autocorrelation function  $\langle \mathbf{u}(t)\mathbf{u}(0) \rangle$ , where  $\mathbf{u}(t)$  is the unit vector at time  $t$  along the chain end-to-end vector. The points are the values calculated from the simulations and the dashed lines show the best fit to the KWW equation. b) Mean-square internal distances for the linear (LPE) and hydrogenated polybutadiene (PBE2) models.

## S.2 Calculated Rouse and reptation relaxation times as well as friction coefficients for LPE and PEB2 simulated systems.

For the two untangled systems, we have directly obtained the Rouse time ( $\tau_R$ ) from the crossover point in the  $g_1(t)$  graph as shown in the figure S.2:

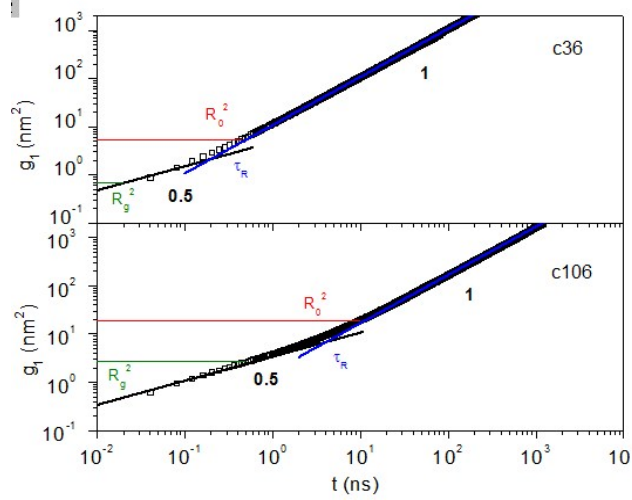

**Figure S.2.** Mean-squared monomer displacement,  $g_1(t)$ , for the untangled PEB2\_36 and PEB2\_106.

The obtained relaxation times are collected in Table S.2. As it can be seen in this table, the  $\tau_{ACF}$  is smaller than the corresponding  $\tau_R$  as discussed by other authors (ref. 25 in the main text).

Using these  $\tau_R$  values of untangled systems, it is possible to obtain the friction coefficient by means of the equation:

$$\tau_R = \frac{\zeta N \langle R_0^2 \rangle}{3\pi^2 k_B T} \quad (1)$$

The obtained values are shown in Table S.2. As the coefficient friction is independent of molecular weight above a certain value (see Figure 8 in ref. 29), we have used the value of  $\zeta$  corresponding to LPE\_106 or PEB2\_106 to calculate the  $\tau_R$  for the entangled systems by applying Eq. 1.

Then, the reptation times can be obtained using different approaches: i)  $\tau_d$  is directly obtained from the  $g_1(t)$  graph as  $g_1(\tau_d) = \langle R_0^2 \rangle$ , ii) from pure reptation model as  $\tau_d^0 = 3\tau_e Z^3 = 3\tau_R Z$  (ref.46 main text) and iii) using the contour length fluctuation (CLF) model as  $\tau_d^{th} = 3\tau_e Z^3 (1-X Z^{-1/2})^2$ , with  $X=0.6$  (ref.46 main text). In all cases, the  $\tau_{ACF}$  is an order of magnitude smaller than the  $\tau_d$ . This could indicate that the single KWW fitting is not adequate to calculate the reptation times.

As expected, the  $\tau_d^0$  (pure reptation model) is higher than  $\tau_d^{th}$  (taking into account the CLF corrections). The  $\tau_d$  value obtained directly from the simulations is similar to the  $\tau_d^{th}$  indicating that the simulations capture the CLF mechanism.

Table S.2: Calculated relaxation times and friction coefficients for all simulated systems.

| Sample   | $M$<br>kg·mol <sup>-1</sup> | $\langle R_0^2 \rangle$<br>(nm <sup>2</sup> ) | $Z$ | $\tau_R$<br>(ns)   | $\tau_d^0$<br>(ns) | $\tau_d$<br>(ns)  | $\tau_d^{th}$<br>(ns) | $\tau_{ACF}^b$<br>(ns) | $\zeta$<br>(10 <sup>10</sup> dyn s cm <sup>-1</sup> ) |
|----------|-----------------------------|-----------------------------------------------|-----|--------------------|--------------------|-------------------|-----------------------|------------------------|-------------------------------------------------------|
| PEB2_36  | 0.536                       | 5.40                                          | -   | 0.196 <sup>a</sup> | -                  | -                 | -                     | 0.137                  | 2.10 ± 0.19 <sup>c</sup>                              |
| PEB2_106 | 1.547                       | 19.07                                         | -   | 4.7 <sup>a</sup>   | -                  | -                 | -                     | 1.73                   | 4.82 ± 0.45 <sup>c</sup>                              |
| PEB2_192 | 2.811                       | 35.86                                         | 2.6 | 15.9 <sup>d</sup>  | 110 <sup>e</sup>   | 62.9 <sup>e</sup> | 43.7 <sup>e</sup>     | 7.7                    | -                                                     |
| PEB2_377 | 5.493                       | 73.11                                         | 5   | 63.7 <sup>d</sup>  | 788 <sup>e</sup>   | 630 <sup>e</sup>  | 421.6 <sup>e</sup>    | 58.2                   | -                                                     |
| LPE_36   | 0.507                       | 5.73                                          | -   | 0.168 <sup>a</sup> | -                  | -                 | -                     | 0.135                  | 1.69 ± 0.19 <sup>c</sup>                              |
| LPE_106  | 1.489                       | 19.78                                         | -   | 3.2 <sup>a</sup>   | -                  | -                 | -                     | 1.70                   | 3.17 ± 0.39 <sup>c</sup>                              |
| LPE_192  | 2.695                       | 37.14                                         | 3.4 | 9.8 <sup>d</sup>   | 94.3 <sup>e</sup>  | 53.6 <sup>e</sup> | 42.9 <sup>e</sup>     | 7.3                    | -                                                     |
| LPE_377  | 5.290                       | 75.66                                         | 6.6 | 39.2 <sup>d</sup>  | 690 <sup>e</sup>   | 502 <sup>e</sup>  | 405.3 <sup>e</sup>    | 48.0                   | -                                                     |

<sup>a</sup> Rouse time obtained directly from the crossover point in the  $g_1(t)$  vs  $t$  graph (see Figure 3 in the main text)

<sup>b</sup> Longest relaxation time from KWW equation (see S.1)

<sup>c</sup> The  $\tau_R$  values of unentangled systems have used to calculate the coefficient friction ( $\zeta$ ) by applying  $\tau_R = \zeta N \langle R_0^2 \rangle / 3\pi^2 k_B T$  (ref.46 main text)

<sup>d</sup> Using the  $\zeta$  corresponding to LPE\_106 or PEB2\_106, one can calculate the  $\tau_R$  for the entangled systems by applying the above equation.

<sup>e</sup> The reptation times are obtained as: i)  $\tau_d$  is directly obtained from the  $g_1(t)$  graph as  $g_1(\tau_d) = \langle R_0^2 \rangle$ , ii) from pure reptation model as  $\tau_d^0 = 3\tau_e Z^3 = 3\tau_R Z$  (ref.46 main text) and iii) using the contour length fluctuation (CLF) model as  $\tau_d^{th} = 3\tau_e Z^3 (1-X Z^{-1/2})^2$ , with  $X=0.6$  (ref.46 main text).

**S.3 Characteristic ratio ( $C_n$ ) for the linear polyethylene (LPE) and hydrogenated polybutadiene (PEB2) as a function of the molecular length.**

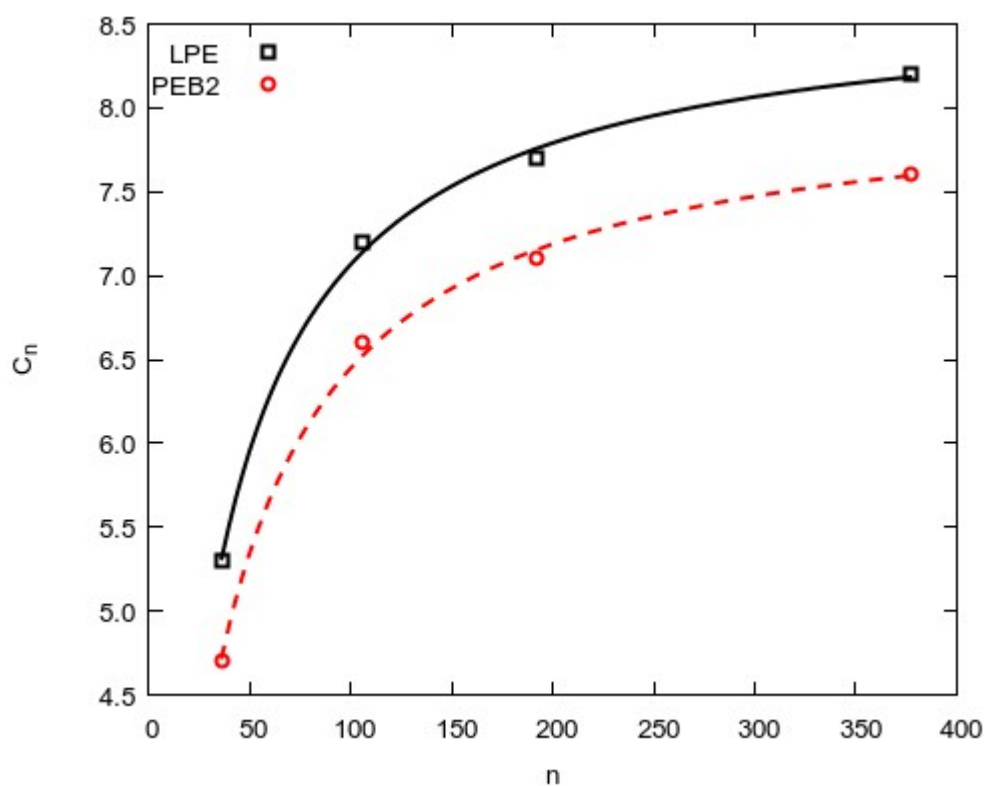

**Figure S.3.** Characteristic ratio ( $C_n$ ) for the linear polyethylene (LPE) and hydrogenated polybutadiene (PEB2) as a function of the molecular length ( $n$ ). For a nice explanation of characteristic ratio as an indicator of the chain stiffness see, for example, Bicerano J., Computational and Theoretical Polymer Science, 8, 9-13, 1998.

#### S.4 Mean-squared monomer displacement for the simulated and PEB2 models.

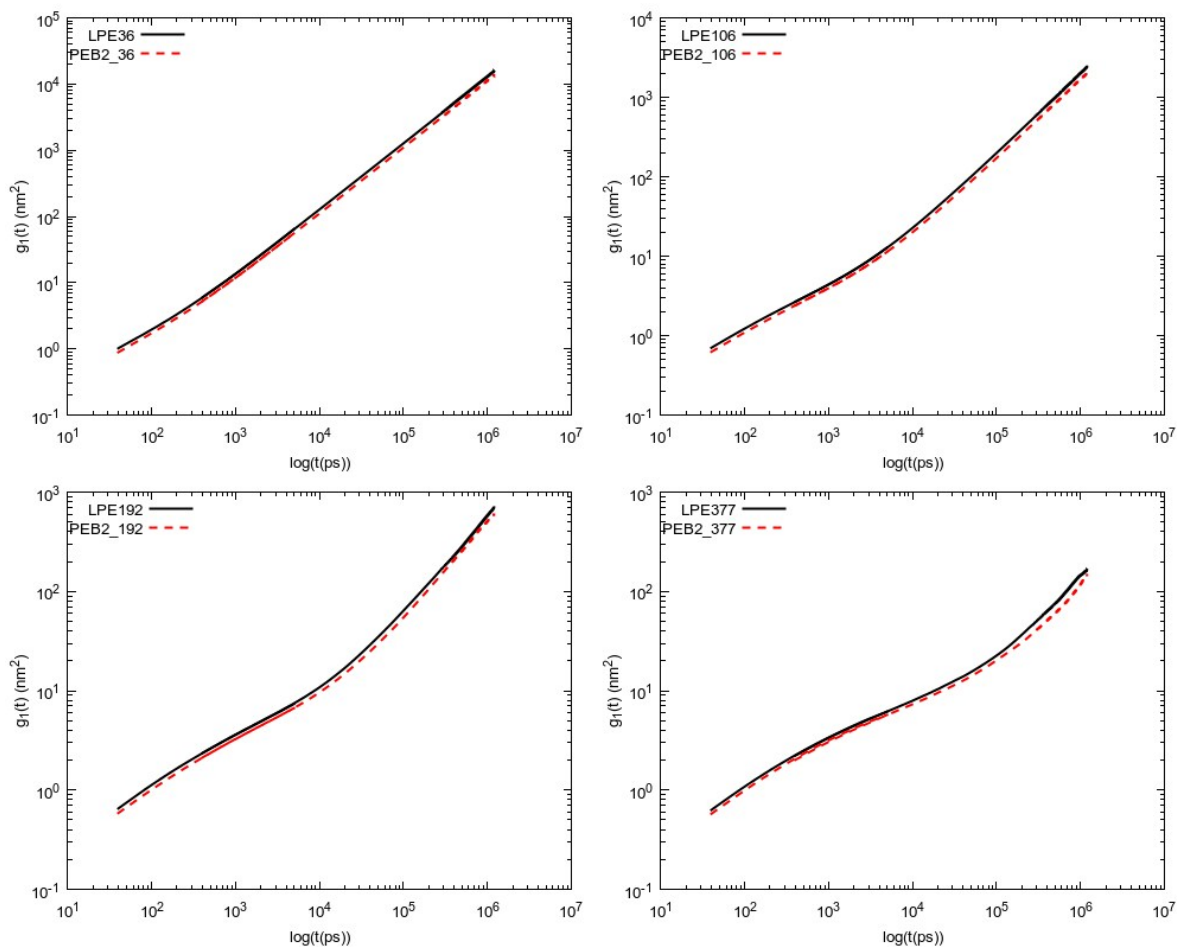

**Figure S.4.** Mean-squared monomer displacement,  $g_1(t)$ , for the simulated LPE (solid lines) and PEB2 (dashed lines) samples at 509 K. The ethyl branches seem to produce a slow-down of the segmental dynamics in all cases.

### S.5 Intermolecular radial pair distribution functions, $g_{\text{inter}}(r)$ .

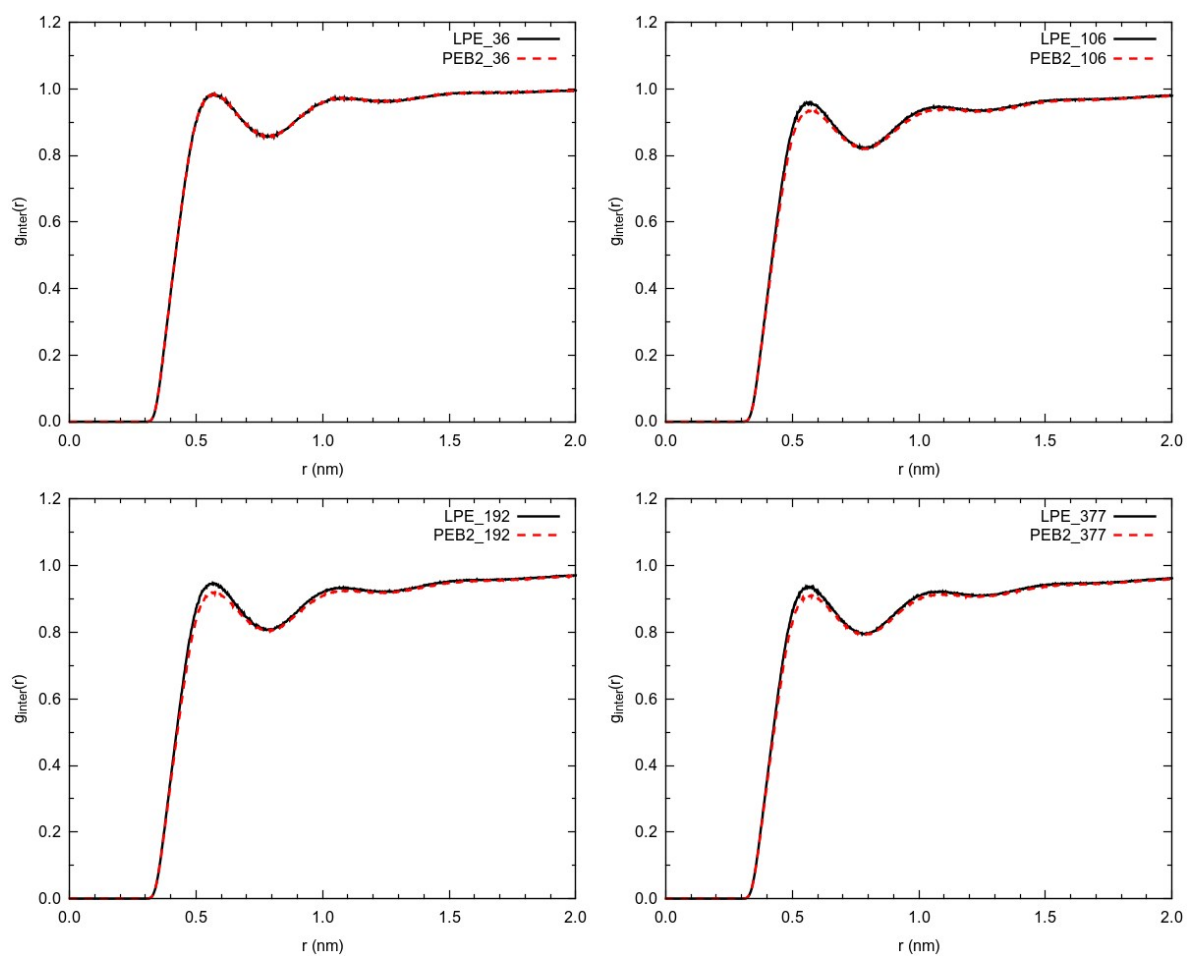

**Figure S.5.** Intermolecular radial pair distribution function of the simulated LPE (black solid lines) and PEB2 (red dashed lines) samples at 509 K.
